# Supplementary material for: Naturally Arising Human CD4 T-Cells That Recognize Islet Autoantigens and Secrete Interleukin-10 Regulate Proinflammatory T-Cell Responses via Linked Suppression
Source: PubMed Central journal article supplement — Diabetes. 2010 Mar 18;59(6):1451–60. doi: 10.2337/db09-0503 (PMC2874706; doi:10.2337/db09-0503), 2010-03-18
Supplement: supp_db09-0503_onlineappendix_2.pdf [file supp_db09-0503_onlineappendix_2.pdf]

## Supplementary Table 2

Details of external (ex) and internal (in) primer pairs used for single cell multiplex RT-PCR.

| Template       | ex/in | Sense primer          | Anti-sense primer       |
|----------------|-------|-----------------------|-------------------------|
| CD3 $\epsilon$ | ex    | ATAGGCGGTGATGAGGATGA  | TAGTCTGGGTTGGGAACAGG    |
| CD3 $\epsilon$ | in    | ATGTCTGCTACCCCAGAGGA  | TGGCCTCTCCTTGTTTTGTC    |
| IL-10          | ex    | GAGAACAGCTGCACCCACTT  | GGCCTTGCTCTTGTTTTCAC    |
| IL-10          | in    | TGCCTTCAGCAGAGTGAAGA  | GGGAAGAAATCGATGACAGC    |
| granzyme A     | ex    | GAACAAAAGGTCCCAGGTCA  | GCACGAGTCTCTCCACCTC     |
| granzyme A     | in    | TTGGGGCTCACTCAATAACC  | GGCTTCCAGCACAAACCATA    |
| granzyme B     | ex    | CCCTGGGAAAACATTCACAC  | ATTACAGCGGGGGCTTAGTT    |
| granzyme B     | in    | TGAAGATGACAGTGCAGGAAG | CGTTTCATGGTTTTCTTTATCCA |
| perforin       | ex    | CATGTAACCAGGGCCAAAGT  | CCGAACAGCAGGTCGTTAAT    |
| perforin       | in    | GCTGGACGTGACTCCTAAGC  | AGGGCCCTCTTGAAGTCAG     |
